# Supplementary material for: Assessing minimum pyroclastic density current mass to impact critical infrastructures: example from Aso Caldera (Japan)
Source: Copernicus journal article supplement (doi:10.5194/nhess-2022-100), 2022-04-12
Supplement: Supplementary file 1 [file nhess-2022-100-supplement.zip]

Archive with 3 entries (3 files):
- Supporting Information.pdf
- textS1.pdf
- textS2.pdf
