# Supplementary material for: Assessing minimum pyroclastic density current mass to impact critical infrastructures: example from Aso Caldera (Japan)
Source: Copernicus journal article supplement (doi:10.5194/nhess-2022-100), 2022-04-12
Supplement: Supplementary file 1 [file nhess-2022-100-supplement.zip › textS1.pdf]

# Notes on the analytic solution of box model equations for gravity-driven particle currents with constant volume

Supporting Information S1 for

---

## Assessing minimum pyroclastic density current volume to impact critical infrastructures: example from Aso Caldera (Japan)

Andrea Bevilacqua<sup>(1)</sup>, Alvaro Aravena<sup>(2)</sup>, Willy Aspinall<sup>(3)</sup>, Antonio Costa<sup>(4)</sup>, Sue Mahony<sup>(3)</sup>, Augusto Neri<sup>(1)</sup>, Stephen Sparks<sup>(3)</sup>, Brittain Hill<sup>(5)</sup>

<sup>1</sup>Istituto Nazionale di Geofisica e Vulcanologia, Sezione di Pisa, Pisa, Italy.

<sup>2</sup>Laboratoire Magmas et Volcans, Université Clermont Auvergne, CNRS, IRD, OPGC, Clermont-Ferrand, France.

<sup>3</sup>University of Bristol, School of Earth Sciences, Bristol, United Kingdom.

<sup>4</sup>Istituto Nazionale di Geofisica e Vulcanologia, Sezione di Bologna, Bologna, Italy.

<sup>5</sup>University of South Florida, School of Geosciences, Tampa, FL, United States.

We summarize the physical equations and analytic solutions of three versions of the box model equations, suitable for the integral formulation of axisymmetric gravity-driven particle currents with constant volume. The first model is based on a simple constant resisting stress, while the second and third models assume flow dilution by particle deposition. The third model is characterized by assuming an interstitial fluid lighter than the ambient fluid. All the calculations are performed on a flat topography. Ambient fluid entrainment and cooling effects are not considered. All particles are assumed to deposit at the same velocity.

## 1 Introduction

The box model integral formulation for gravity-driven particle currents is based on the pioneering work of Huppert and Simpson (1980). The theory is detailed in Bonnetaze et al. (1995); Hallworth et al. (1998). We assume axisymmetric geometry and constant volume of the flow<sup>1</sup>. We solve the equations over a flat topography, with no slope or obstacles. Ambient fluid entrainment is neglected and thermal properties of the flow remain constant<sup>2</sup>. In the second and third model all the solid particles are assumed to deposit at the same velocity, thus neglecting differences in particle size and shape.

## 2 Box model with constant resisting stress

This model is described in Dade and Huppert (1998) and it is at the base of the depth-averaged model in Kelfoun et al. (2009). We consider the work  $W(t)$  done by a constant resisting stress  $\tau_c$  acting over the basal area  $A$  of the flow. We assume the flow geometry to be cylindrical, so  $A(r) = \lambda r^2$ , where  $r$  is the cylinder radius.

Let us consider the time interval  $[0, t]$  and assume  $L(0) = 0$ . We obtain:

$$W(t) = \int_0^{L(t)} \tau_c \cdot A(r) dr = \int_0^{L(t)} \tau_c \cdot \lambda r^2 dr = \frac{\tau_c}{3} \lambda L(t)^3 = \tau \lambda L(t)^3,$$

where  $L(t)$  is the radial distance reached by the current at time  $t$ ,  $\lambda$  is half-central angle of the cylindrical sector considered, and  $\tau := \frac{\tau_c}{3}$  is the effective stress constant.

Let us also assume that the total energy of the flow at  $t_0 = 0$  is:

$$Q(t_0) = gH\rho V,$$

where  $g$  is gravity,  $\rho$  is the density of the flowing material,  $H$  is the height drop of the flow, and  $V$  its volume. We finally assume that the volume  $V$  of the current is preserved.

Hence, the kinetic energy of the flow at time  $t$  is given by:

$$K(t) = gH\rho V - \lambda \tau L(t)^3.$$

---

<sup>1</sup>this is not the formulation adopted in Dade and Huppert (1996), which assumed constant volume flux.

<sup>2</sup>air entrainment and cooling effects are explored in Bursik and Woods (1996); Fauria et al. (2016).

Assuming  $K(t_f) = 0$  at the instant  $t_f$  at which the runout distance  $L(t_f)$  is reached, we obtain:

$$V = \frac{\lambda \tau L(t_f)^3}{g H \rho}.$$

### 3 Box model with particle deposition

This model is described in Dade and Huppert (1995) and it adopted in Neri et al. (2015); Bevilacqua et al. (2017). Further description of this approach is provided in Bevilacqua (2016); Esposti Ongaro et al. (2016). We consider the Von Kármán equation for density currents:

$$\frac{dL}{dt}(t) = Fr \sqrt{h(t) g \frac{\rho_c(t) - \rho_a}{\rho_a}},$$

where  $L(t)$  and  $h(t)$  are the radial distance reached by the current and its height, at time  $t$ . In our notation  $Fr$  is the Froude Number,  $g$  is gravity. We express the density of the current  $\rho_c$  by:

$$\rho_c(t) = \phi(t)\rho + [1 - \phi(t)]\rho_a$$

where  $\rho$  is the density of the solid particles, and  $\rho_a$  is the density of ambient fluid. Finally, the equation

$$\frac{d\phi}{dt}(t) = -w_s \frac{\phi(t)}{h(t)}$$

defines the particle volume fraction  $\phi(t)$  at time  $t$ .

Let us also assume that the volume  $V$  of the current is preserved, and that its geometry is cylindrical:

$$V = L(t)^2 h(t) \lambda = \text{const},$$

where  $\lambda$  is half-central angle of the cylindrical sector considered ( $\lambda = \pi$  in axisymmetric examples).

In summary:

$$\begin{cases} \frac{dL}{dt}(t) = Fr \sqrt{h(t) \phi(t) g \frac{\rho - \rho_a}{\rho_a}}, \\ \frac{d\phi}{dt}(t) = -w_s \frac{\phi(t)}{h(t)}, \\ V \equiv L(t)^2 h(t) \lambda. \end{cases}$$

#### 3.1 Derivation of the equation for the volume V

Let us consider the formal expression:

$$\frac{d\phi}{dL}(t) = \frac{d\phi}{dt}(t) \left[ \frac{dL}{dt}(t) \right]^{-1},$$

and so

$$\frac{d\phi}{dL}(t) = -w_s \frac{\phi(t)}{h(t)} \left[ Fr \sqrt{h(t) \phi(t) g_p} \right]^{-1},$$

where we use the short notation  $g_p := g \frac{\rho - \rho_a}{\rho_a}$ .

If we plug in the expression  $h(t) = \frac{V}{\lambda L(t)^2}$ , we obtain:

$$\frac{d\phi}{dL}(t) = -w_s \phi^{1/2}(t) L(t)^3 \left[ Fr g_p^{1/2} \frac{V^{3/2}}{\lambda} \right]^{-1}.$$

If we define

$$\eta := w_s \left( Fr g_p^{1/2} \frac{V^{3/2}}{\lambda} \right)^{-1},$$

we can write:

$$\phi(t)^{-1/2} d\phi = -\eta L^3 dL.$$

If we integrate the differential expression over  $[0, t]$ , assuming  $\phi(0) = \phi_0$  and  $L(0) = 0$ , we get:

$$\phi^{1/2}(t) = \phi_0^{1/2} - \frac{1}{8}\eta L(t)^4.$$

Finally, assuming  $\phi(t_f) = 0$  at the instant  $t_f$  at which the runout distance  $L(t_f)$  is reached, we obtain:

$$L(t_f) = \left( \frac{8\phi_0^{1/2}}{\eta} \right)^{1/4} = \left[ 8 \frac{Fr \phi_0^{1/2} g_p^{1/2} (V/\lambda)^{3/2}}{w_s} \right]^{1/4},$$

and so

$$V = \lambda \left( \frac{L^4 w_s}{8\phi_0^{1/2} g_p^{1/2} Fr} \right)^{2/3} = \lambda \frac{L^{8/3} w_s^{2/3}}{4\phi_0^{1/3} g_p^{1/3} Fr^{2/3}}.$$

## 4 Two-phase box model (interstitial fluid + solid particles)

We consider the Von Kármán equation for density currents:

$$\frac{dL}{dt}(t) = Fr \sqrt{h(t) g \frac{\rho_c(t) - \rho_a}{\rho_a}},$$

where  $L(t)$  and  $h(t)$  are the radial distance reached by the current and its height, at time  $t$ . In our notation  $Fr$  is the Froude Number,  $g$  is gravity. We express the density of the current  $\rho_c$  by:

$$\rho_c(t) = \phi(t)\rho + [1 - \phi(t)]\rho_i$$

where  $\rho$  is the density of the solid particles, and  $\rho_i$  is the density of interstitial fluid. We have that:

$$\frac{\rho_c - \rho_a}{\rho_a} = \frac{\phi(t)\rho + [1 - \phi(t)]\rho_i - \rho_a}{\rho_a} = \phi(t) \frac{\rho - \rho_i}{\rho_a} + \frac{\rho_i - \rho_a}{\rho_a} = [\phi(t) - \phi_{cr}] \frac{\rho - \rho_i}{\rho_a},$$

where we called  $\phi_{cr} := \frac{\rho_a - \rho_i}{\rho - \rho_i}$ .

Finally, the equation

$$\frac{d\phi}{dt}(t) = -w_s \frac{\phi(t)}{h(t)}$$

defines the particle volume fraction  $\phi(t)$  at time  $t$ .

Let us also assume that the volume  $V$  of the current is preserved, and that its geometry is cylindrical<sup>3</sup>:

$$V = L(t)^2 h(t) \lambda = \text{const},$$

where  $\lambda$  is half-central angle of the cylindrical sector considered ( $\lambda = \pi$  in axisymmetric examples).

In summary:

$$\begin{cases} \frac{dL}{dt}(t) = Fr \sqrt{h(t) [\phi(t) - \phi_{cr}] g \frac{\rho - \rho_i}{\rho_a}}, \\ \frac{d\phi}{dt}(t) = -w_s \frac{\phi(t)}{h(t)}, \\ V \equiv L(t)^2 h(t) \lambda. \end{cases}$$

---

<sup>3</sup>the analytic solutions in cartesian geometry are provided in Esposti Ongaro et al. (2016).

## 4.1 Derivation of the equation for the volume V

Let us consider the formal expression:

$$\frac{d\phi}{dL}(t) = \frac{d\phi}{dt}(t) \left[ \frac{dL}{dt}(t) \right]^{-1},$$

and so

$$\frac{d\phi}{dL}(t) = -w_s \frac{\phi(t)}{h(t)} \left[ Fr \sqrt{h(t)} [\phi(t) - \phi_{cr}] g_c \right]^{-1},$$

where we use the short notation  $g_c := g \frac{\rho - \rho_i}{\rho_a}$ .

If we plug in the expression  $h(t) = \frac{V}{\lambda L(t)^2}$ , we obtain:

$$\frac{d\phi}{dL}(t) = -w_s \frac{\phi(t)}{\sqrt{\phi(t) - \phi_{cr}}} L(t)^3 \left[ Fr g_c^{1/2} \frac{V^{3/2}}{\lambda} \right]^{-1}.$$

If we define the function:

$$\hat{\phi}(t) = \frac{\phi(t)}{\phi_{cr}},$$

and the constant

$$\eta := w_s \left( Fr g_c^{1/2} \frac{V^{3/2}}{\lambda} \right)^{-1},$$

we can write:

$$\frac{d\hat{\phi}}{dL}(t) = -\eta \frac{\hat{\phi}(t)}{\phi_{cr}^{1/2} (\hat{\phi}(t) - 1)^{1/2}},$$

and then

$$\frac{\phi_{cr}^{1/2} (\hat{\phi}(t) - 1)^{1/2}}{\hat{\phi}(t)} d\hat{\phi} = -\eta L^3 dL.$$

If we integrate the differential expression over  $[0, t]$ , assuming  $\hat{\phi}(0) = \hat{\phi}_0$  and  $L(0) = 0$ , we get:

$$F(\hat{\phi}(t)) = F(\hat{\phi}_0) - \frac{\eta}{4\phi_{cr}^{1/2}} L(t)^4,$$

where we defined the function:

$$F(x) := 2 \left[ \sqrt{x-1} - \arctan(\sqrt{x-1}) \right].$$

Indeed:

$$\int \frac{\sqrt{x-1}}{x} dx = \int \frac{2z^2}{z^2+1} dz = 2 \int dz - 2 \int \frac{1}{z^2+1} dz = 2[z - \arctan(z)] + c,$$

where  $z := \sqrt{x-1}$ .

Finally, assuming  $\hat{\phi}(t_f) = 1$  at the instant  $t_f$  at which the runout distance  $L(t_f)$  is reached, we obtain:

$$L(t_f) = \left( \frac{4\phi_{cr}^{1/2} F(\hat{\phi}_0)}{\eta} \right)^{1/4} = \left[ \frac{8\phi_{cr}^{1/2} \left[ \sqrt{\frac{\phi_0}{\phi_{cr}}} - 1 - \arctan\left(\sqrt{\frac{\phi_0}{\phi_{cr}}} - 1\right) \right] g_c^{1/2} Fr (V/\lambda)^{3/2}}{w_s} \right]^{1/4},$$

and so

$$V = \lambda \left( \frac{L^4 w_s}{4\phi_{cr}^{1/2} F(\hat{\phi}_0) g_c Fr} \right)^{2/3} = \lambda \frac{L^{8/3} w_s^{2/3}}{4\phi_{cr}^{1/3} \left[ \sqrt{\frac{\phi_0}{\phi_{cr}}} - 1 - \arctan\left(\sqrt{\frac{\phi_0}{\phi_{cr}}} - 1\right) \right]^{2/3} g_c^{1/3} Fr^{2/3}}.$$

## References

- Bevilacqua, A. (2016). *Doubly stochastic models for volcanic hazard assessment at Campi Flegrei caldera*, volume 21 of *Theses*. Edizioni della Normale, Birkhäuser/Springer.
- Bevilacqua, A., Neri, A., Bisson, M., Esposti Ongaro, T., Flandoli, F., Isaia, R., Rosi, M., and Vitale, S. (2017). The effects of vent location, event scale, and time forecasts on pyroclastic density current hazard maps at Campi Flegrei caldera (Italy). *Frontiers in Earth Science*, 5:72.
- Bonnecaze, R. T., Hallworth, M. A., Huppert, H. E., and Lister, J. R. (1995). Axisymmetric particle-driven gravity currents. *Journal of Fluid Mechanics*, 294:93121.
- Bursik, M. and Woods, A. (1996). The dynamics and thermodynamics of large ash flows. *Bulletin of Volcanology*, 58(2):175–193.
- Dade, W. and Huppert, H. (1995). Runout and fine-sediment deposits of axisymmetric turbidity currents. *Journal of Geophysical Research: Oceans*, 100(C9):18597–18609.
- Dade, W. B. and Huppert, H. E. (1996). Emplacement of Taupo ignimbrite. *Nature*, 385:307–308.
- Dade, W. B. and Huppert, H. E. (1998). Long-runout rockfalls. *Geology*, 26(9):803–806.
- Esposti Ongaro, T., Orsucci, S., and Cornolti, F. (2016). A fast, calibrated model for pyroclastic density currents kinematics and hazard. *Journal of Volcanology and Geothermal Research*, 327:257 – 272.
- Fauria, K., Manga, M., and Chamberlain, M. (2016). Effect of particle entrainment on the runout of pyroclastic density currents. *Journal of Geophysical Research: Solid Earth*, 121(9):6445–6461.
- Hallworth, M., Hogg, A., and Huppert, H. (1998). Effects of external flow on compositional and particle gravity currents. *Journal of Fluid Mechanics*, 359:109142.
- Huppert, H. and Simpson, J. (1980). The slumping of gravity currents. *Journal of Fluid Mechanics*, 99(4):785799.
- Kelfoun, K., Samaniego, P., Palacios, P., and Barba, D. (2009). Testing the suitability of frictional behaviour for pyroclastic flow simulation by comparison with a well-constrained eruption at Tungurahua volcano (Ecuador). *Bulletin of Volcanology*, 71:1057–1075.
- Neri, A., Bevilacqua, A., Esposti Ongaro, T., Isaia, R., Aspinall, W. P., Bisson, M., Flandoli, F., Baxter, P. J., Bertagnini, A., Iannuzzi, E., Orsucci, S., Pistolesi, M., Rosi, M., and Vitale, S. (2015). Quantifying volcanic hazard at Campi Flegrei caldera (Italy) with uncertainty assessment: 2. Pyroclastic density current invasion maps. *Journal of Geophysical Research: Solid Earth*, 120(4):2330–2349.
