# Supplementary material for: Assessing minimum pyroclastic density current mass to impact critical infrastructures: example from Aso Caldera (Japan)
Source: Copernicus journal article supplement (doi:10.5194/nhess-2022-100), 2022-04-12
Supplement: Supplementary file [file Aspinall et al RMEGV2021 Peer review.pdf › Aspinall et al RMEGV2021 Peer review.pdf]

## Notification of Acceptance

Submission ID: 35

Paper Title: Aso volcano: estimating the probabilistic likelihood of a future Aso4-scale eruption from stochastic uncertainty analysis of volcanological evidence using importance sampling

## Comments and suggested revisions

### Review 1

I do not have a particular comment on the manuscript. However, I am amazed with its very international authorship

### Review 2

The contents are comprehensive. Please check the equation writing style.

## Paper Format

1) All items as below are included within the first page.

(title, authors' name, affiliation, email address of Corresponding author, abstract, keywords)

Yes

2) You use a template provided (header, blank or space)

Yes

3) The length of Proceedings paper is within 6 pages.

Yes

4) All items below should be in the center.

(title, authors' name, affiliation, email address of Corresponding author, text of "abstract", chart explanation, formula)

Yes

5) The "keywords" headers, chapter and section headers all aligned to the left?

Yes

6) Both sides of the main article are aligned?

Yes

7) Are mathematical expression numbers aligned to the right?

No

8) Is the font Times New Roman?

Yes

9) Is the size of the title font of the Proceedings paper 14 points?

Yes

10) Are fonts other than the title all 11 points?

Yes

11) Are affiliations written in italics?

Yes

12) Are the title, "Proceedings paper" header and chapter and section headers all in bold?

Yes

13) Are the authors and Western-calendar dates of all reference materials labeled?

Yes

14) Are space lines inserted appropriately between items, chapters, and the like?

**RMEGV2021**

## **Notification of Acceptance**

Yes

15) Are only the first letters of each of the words in the title, the author's name and affiliation written in upper case?

Yes

---end---
