# Supplementary material for: Assessing minimum pyroclastic density current mass to impact critical infrastructures: example from Aso Caldera (Japan)
Source: Copernicus journal article supplement (doi:10.5194/nhess-2022-100), 2022-04-12
Supplement: Supplementary file [file SupportingInformation_revised.pdf › SupportingInformation_revised.pdf]

## Supporting Information for

### **Assessing minimum PDC volume from a large explosive volcanic eruption impacting critical infrastructures: an example from Aso Caldera (Japan)**

Andrea Bevilacqua<sup>(1)</sup>, Alvaro Aravena<sup>(2,6)</sup>, Willy Aspinall<sup>(3)</sup>, Antonio Costa<sup>(4)</sup>, Sue Mahony<sup>(3)</sup>, Augusto Neri<sup>(1)</sup>, Stephen Sparks<sup>(3)</sup>, Brittain Hill<sup>(5)</sup>

<sup>1</sup>Istituto Nazionale di Geofisica e Vulcanologia, Sezione di Pisa, Pisa, Italy.

<sup>2</sup>Laboratoire Magmas et Volcans, Université Clermont Auvergne, CNRS, IRD, OPGC, Clermont-Ferrand, France.

<sup>3</sup>University of Bristol, School of Earth Sciences, Bristol, United Kingdom.

<sup>4</sup>Istituto Nazionale di Geofisica e Vulcanologia, Sezione di Bologna, Bologna, Italy.

<sup>5</sup>University of South Florida, School of Geosciences, Tampa, FL, United States.

<sup>6</sup>Facultad de Ciencias Básicas, Universidad Católica del Maule, Talca, Chile.

### **Additional Supporting Information (Files uploaded separately)**

Caption for Text S1 to S2

### **Contents of this file**

Table S3 to S6

Figure S7 to S8

### **Text S1. Notes on the analytic solution of box model equations for gravity-driven particle currents with constant volume.**

We summarize the physical equations and analytic solutions of three versions of the box model equations, suitable for the integral formulation of axisymmetric gravity-driven particle currents with constant volume. The first model is based on a simple constant resisting stress, while the second and third models assume flow dilution by particle deposition. The third model is characterized by assuming an interstitial fluid lighter than the ambient fluid. All the calculations are performed on a flat topography. Ambient fluid entrainment and cooling effects are not considered. All particles are assumed to deposit at the same velocity.

### **Text S2. Log of scientific email exchanges between co-authors and other colleagues: December 2018 – February 2019.**

We summarize the knowledge exchanges that involved five of the co-authors, concerned with assessing the probability of an Aso4-scale future eruption and four other colleagues providing detailed volcanological support. All names have been anonymized. Note that the marker sites (MS) were called “target sites” (TS) in this document.

**Table S3.** Numerical results of the minimum PDC volume and mass needed to reach the MS2, with and without consideration of topographic effects (see Section 4.4). Estimates based on 100,000 statistical samples.

| <b>No topographic effects modelled</b>                                          |              |               |             |               |
|---------------------------------------------------------------------------------|--------------|---------------|-------------|---------------|
| <i>MinVol: Minimum PDC volume [km<sup>3</sup>] required to reach the MS2</i>    |              |               |             |               |
| <b>Model</b>                                                                    | <b>5%ile</b> | <b>50%ile</b> | <b>mean</b> | <b>95%ile</b> |
| Model 1: Elicited inputs                                                        | 29.6         | 294           | 504         | 1650          |
| Model 2a: Elicited inputs                                                       | 11.3         | 61.8          | 86.2        | 250           |
| Model 2b: Modified inputs*                                                      | 8.08         | 18.5          | 19.2        | 33.2          |
| Model 2c: Elicited inputs                                                       | 7.55         | 48.3          | 71.3        | 222           |
| <i>MinMass: Minimum PDC mass [10<sup>12</sup> kg] required to reach the MS2</i> |              |               |             |               |
| <b>Model</b>                                                                    | <b>5%ile</b> | <b>50%ile</b> | <b>Mean</b> | <b>95%ile</b> |
| Model 1: Elicited inputs                                                        | 31.4         | 303           | 500         | 1580          |
| Model 2a: Elicited inputs                                                       | 19.2         | 106           | 147         | 431           |
| Model 2b: Modified inputs*                                                      | 13.9         | 31.6          | 32.8        | 56.2          |
| Model 2c: Elicited inputs                                                       | 12.6         | 82.4          | 123         | 385           |
| <b>With topographic effects included</b>                                        |              |               |             |               |
| <b>Minimum PDC volume [km<sup>3</sup>] required to reach the MS2</b>            |              |               |             |               |
| <b>Model</b>                                                                    | <b>5%ile</b> | <b>50%ile</b> | <b>mean</b> | <b>95%ile</b> |
| Model 1: Elicited inputs                                                        | 156          | 1550          | 2660        | 8710          |
| Model 2a: Elicited inputs                                                       | 49.6         | 271           | 378         | 1100          |
| Model 2b: Modified inputs*                                                      | 35.4         | 81.0          | 84.4        | 146           |
| Model 2c: Elicited inputs                                                       | 33.1         | 212           | 313         | 974           |
| <b>Minimum PDC mass [10<sup>12</sup> kg] required to reach the MS2</b>          |              |               |             |               |
| <b>Model</b>                                                                    | <b>5%ile</b> | <b>50%ile</b> | <b>mean</b> | <b>95%ile</b> |
| Model 1: Elicited inputs                                                        | 165          | 1600          | 2640        | 8340          |
| Model 2a: Elicited inputs                                                       | 84.1         | 465           | 646         | 1890          |
| Model 2b: Modified inputs*                                                      | 60.9         | 139           | 144         | 247           |
| Model 2c: Elicited inputs                                                       | 55.5         | 361           | 540         | 1690          |

\* Modified  $\phi_0$  and  $w_s$  based on MDR modelling and Sauter diameter of analogues (see Table 1).

**Table S4.** Numerical results of the probability that a PDC derived from a caldera-forming eruption similar to Aso-4 reaches the MS<sub>2</sub>, with and without topographic effects. For each scenario, we present the values of the cumulative curves displayed in Figure 4 at the central point of the variation range of the PDC mass, while between parentheses we include the results at the extremes of these variation ranges. We test the mass of PDC overflow outside of the caldera of Aso-4 and 1/10 of that estimate, representing the Aso-4T unit (volumes per Takarada and Hoshizumi, 2020). Estimates based on 100,000 statistical samples.

| <b>Aso-4T</b>                    |                           |                            |
|----------------------------------|---------------------------|----------------------------|
| <b>Model</b>                     | <b>TE<sup>+</sup>: No</b> | <b>TE<sup>+</sup>: Yes</b> |
| Model 1: Elicited inputs         | 15.2% (7.2 – 23.4%)       | 1.2% (0.0 – 3.0%)          |
| Model 2a: Elicited inputs        | 39.2% (19.6 – 54.2%)      | 4.3% (0.5 – 9.3%)          |
| Model 2b: Modified inputs*       | 100.0% (75.9 – 100.0%)    | 13.0% (0.5 – 36.3%)        |
| Model 2c: Elicited inputs        | 48.4% (28.0 – 63.3%)      | 9.2% (2.7 – 16.4%)         |
| <b>Aso-4, total PDC overflow</b> |                           |                            |
| <b>Model</b>                     | <b>TE<sup>+</sup>: No</b> | <b>TE<sup>+</sup>: Yes</b> |
| Model 1: Elicited inputs         | 79.0% (59.0 – 89.9%)      | 30.0% (15.3 – 41.5%)       |
| Model 2a: Elicited inputs        | 100.0% (94.5 – 100.0%)    | 71.2% (45.9 – 84.0%)       |
| Model 2b: Modified inputs*       | 100.0% (100.0 – 100.0%)   | 100.0% (100.0 – 100.0%)    |
| Model 2c: Elicited inputs        | 100.0% (96.3 – 100.0%)    | 77.4% (55.3 – 87.7%)       |

<sup>+</sup> TE: Topographic effects.

\* Modified  $\phi_0$  and  $w_s$  based on MDR modelling and Sauter diameter of analogues (see Table 1).

**Table S5.** Numerical results of the minimum PDC volume and mass needed to reach the MS<sub>3</sub>, with and without consideration of topographic effects (see Section 4.4). Estimates based on 100,000 statistical samples.

| <b>No topographic effects modelled</b>                                          |              |               |             |               |
|---------------------------------------------------------------------------------|--------------|---------------|-------------|---------------|
| <i>MinVol: Minimum PDC volume [km<sup>3</sup>] required to reach the MS3</i>    |              |               |             |               |
| <b>Model</b>                                                                    | <b>5%ile</b> | <b>50%ile</b> | <b>mean</b> | <b>95%ile</b> |
| Model 1: Elicited inputs                                                        | 36.7         | 365           | 625         | 2050          |
| Model 2a: Elicited inputs                                                       | 13.7         | 74.8          | 104         | 303           |
| Model 2b: Modified inputs*                                                      | 9.78         | 22.4          | 23.3        | 40.2          |
| Model 2c: Elicited inputs                                                       | 9.14         | 58.4          | 86.3        | 269           |
| <i>MinMass: Minimum PDC mass [10<sup>12</sup> kg] required to reach the MS3</i> |              |               |             |               |
| <b>Model</b>                                                                    | <b>5%ile</b> | <b>50%ile</b> | <b>Mean</b> | <b>95%ile</b> |
| Model 1: Elicited inputs                                                        | 38.9         | 375           | 619         | 1960          |
| Model 2a: Elicited inputs                                                       | 23.2         | 128           | 178         | 521           |
| Model 2b: Modified inputs*                                                      | 16.8         | 38.3          | 39.6        | 68.0          |
| Model 2c: Elicited inputs                                                       | 15.3         | 99.6          | 149         | 465           |
| <b>With topographic effects included</b>                                        |              |               |             |               |
| <b>Minimum PDC volume [km<sup>3</sup>] required to reach the MS3</b>            |              |               |             |               |
| <b>Model</b>                                                                    | <b>5%ile</b> | <b>50%ile</b> | <b>mean</b> | <b>95%ile</b> |
| Model 1: Elicited inputs                                                        | 137          | 1360          | 2330        | 7640          |
| Model 2a: Elicited inputs                                                       | 44.2         | 241           | 337         | 978           |
| Model 2b: Modified inputs*                                                      | 31.6         | 72.1          | 75.1        | 130           |
| Model 2c: Elicited inputs                                                       | 29.5         | 188           | 279         | 867           |
| <b>Minimum PDC mass [10<sup>12</sup> kg] required to reach the MS3</b>          |              |               |             |               |
| <b>Model</b>                                                                    | <b>5%ile</b> | <b>50%ile</b> | <b>mean</b> | <b>95%ile</b> |
| Model 1: Elicited inputs                                                        | 145          | 1400          | 2310        | 7320          |
| Model 2a: Elicited inputs                                                       | 74.9         | 414           | 575         | 1680          |
| Model 2b: Modified inputs*                                                      | 54.2         | 123           | 128         | 220           |
| Model 2c: Elicited inputs                                                       | 49.4         | 322           | 481         | 1500          |

\* Modified  $\phi_0$  and  $w_s$  based on MDR modelling and Sauter diameter of analogues (see Table 1).

**Table S6.** Numerical results of the probability that a PDC derived from a caldera-forming eruption similar to Aso-4 reaches the MS<sub>3</sub>, with and without topographic effects. For each scenario, we present the values of the cumulative curves displayed in Figure 4 at the central point of the variation range of the PDC mass, while between parentheses we include the results at the extremes of these variation ranges. We test the mass of PDC overflow outside of the caldera of Aso-4 and 1/10 of that estimate, representing the Aso-4T unit (volumes per Takarada and Hoshizumi, 2020). Estimates based on 100,000 statistical samples.

| <b>Aso-4T</b>                    |                           |                            |
|----------------------------------|---------------------------|----------------------------|
| <b>Model</b>                     | <b>TE<sup>+</sup>: No</b> | <b>TE<sup>+</sup>: Yes</b> |
| Model 1: Elicited inputs         | 12.0% (5.5 – 18.7%)       | 1.7% (0.1 – 3.6%)          |
| Model 2a: Elicited inputs        | 32.9% (14.6 – 46.7%)      | 5.5% (0.9 – 11.5%)         |
| Model 2b: Modified inputs*       | 98.9% (58.2 – 100.0%)     | 18.3% (1.2 – 45.7%)        |
| Model 2c: Elicited inputs        | 41.9% (22.6 – 56.0%)      | 10.9% (3.5 – 19.1%)        |
| <b>Aso-4, total PDC overflow</b> |                           |                            |
| <b>Model</b>                     | <b>TE<sup>+</sup>: No</b> | <b>TE<sup>+</sup>: Yes</b> |
| Model 1: Elicited inputs         | 72.0% (53.0 – 84.8%)      | 33.9% (17.7 – 45.1%)       |
| Model 2a: Elicited inputs        | 99.6% (90.4 – 100.0%)     | 75.4% (50.4 – 87.1%)       |
| Model 2b: Modified inputs*       | 100.0% (100.0 – 100.0%)   | 100.0% (100.0 – 100.0%)    |
| Model 2c: Elicited inputs        | 99.9% (93.0 – 100.0%)     | 80.5% (59.7 – 90.2%)       |

<sup>+</sup> TE: Topographic effects.

\* Modified  $\phi_0$  and  $w_s$  based on MDR modelling and Sauter diameter of analogues (see Table 1).

**Table S7.** Numerical results of the minimum PDC volume and mass needed to reach the MS<sub>4</sub>, with and without consideration of topographic effects (see Section 4.4). Estimates based on 100,000 statistical samples.

| <b>No topographic effects modeled</b>                                       |              |               |             |               |
|-----------------------------------------------------------------------------|--------------|---------------|-------------|---------------|
| <i>MinVol: Minimum PDC volume [km<sup>3</sup>] required to reach MS4</i>    |              |               |             |               |
| <b>Model</b>                                                                | <b>5%ile</b> | <b>50%ile</b> | <b>mean</b> | <b>95%ile</b> |
| Model 1: Elicited inputs                                                    | 18.3         | 182           | 312         | 1020          |
| Model 2a: Elicited inputs                                                   | 7.38         | 40.3          | 56.2        | 163           |
| Model 2b: Modified inputs*                                                  | 5.27         | 12.0          | 12.5        | 21.7          |
| Model 2c: Elicited inputs                                                   | 4.93         | 31.5          | 46.5        | 145           |
| <i>MinMass: Minimum PDC mass [10<sup>12</sup> kg] required to reach MS4</i> |              |               |             |               |
| <b>Model</b>                                                                | <b>5%ile</b> | <b>50%ile</b> | <b>Mean</b> | <b>95%ile</b> |
| Model 1: Elicited inputs                                                    | 19.4         | 187           | 309         | 978           |
| Model 2a: Elicited inputs                                                   | 12.5         | 69.1          | 96.1        | 281           |
| Model 2b: Modified inputs*                                                  | 9.06         | 20.6          | 21.4        | 36.7          |
| Model 2c: Elicited inputs                                                   | 8.26         | 53.7          | 80.3        | 251           |
| <b>With topographic effects included</b>                                    |              |               |             |               |
| <b>Minimum PDC volume [km<sup>3</sup>] required to reach MS4</b>            |              |               |             |               |
| <b>Model</b>                                                                | <b>5%ile</b> | <b>50%ile</b> | <b>mean</b> | <b>95%ile</b> |
| Model 1: Elicited inputs                                                    | 44.8         | 446           | 763         | 2500          |
| Model 2a: Elicited inputs                                                   | 16.3         | 89.3          | 125         | 362           |
| Model 2b: Modified inputs*                                                  | 11.7         | 26.7          | 27.8        | 48.0          |
| Model 2c: Elicited inputs                                                   | 10.9         | 69.8          | 103         | 321           |
| <b>Minimum PDC mass [10<sup>12</sup> kg] required to reach MS4</b>          |              |               |             |               |
| <b>Model</b>                                                                | <b>5%ile</b> | <b>50%ile</b> | <b>mean</b> | <b>95%ile</b> |
| Model 1: Elicited inputs                                                    | 47.5         | 458           | 756         | 2400          |
| Model 2a: Elicited inputs                                                   | 27.7         | 153           | 213         | 623           |
| Model 2b: Modified inputs*                                                  | 20.1         | 45.7          | 47.4        | 81.3          |
| Model 2c: Elicited inputs                                                   | 18.3         | 119           | 178         | 556           |

**Table S8.** Numerical results of the probability that a PDC derived from a caldera-forming eruption similar to Aso-4 reaches the MS<sub>4</sub>, with and without topographic effects. We test the mass of PDC overflow outside of the caldera of Aso-4 and 1/10 of that estimate, representing the Aso-4T unit (volumes per Takarada and Hoshizumi, 2020). Estimates based on 100,000 statistical samples.

| <b>Aso-4T</b>                    |                         |                         |
|----------------------------------|-------------------------|-------------------------|
| <b>Model</b>                     | <b>TE+: No</b>          | <b>TE+: Yes</b>         |
| Model 1: Elicited inputs         | 25.3% (12.9 – 37.1%)    | 9.5% (4.1 – 15.0%)      |
| Model 2a: Elicited inputs        | 55.2% (32.6 – 71.5%)    | 27.4% (10.7 – 40.4%)    |
| Model 2b: Modified inputs*       | 100.0% (98.7 – 100.0%)  | 93.6% (42.3 – 100.0%)   |
| Model 2c: Elicited inputs        | 64.1% (41.5 – 77.7%)    | 36.1% (18.1 – 49.6%)    |
| <b>Aso-4, total PDC overflow</b> |                         |                         |
| <b>Model</b>                     | <b>TE+: No</b>          | <b>TE+: Yes</b>         |
| Model 1: Elicited inputs         | 91.5% (74.1 – 97.0%)    | 65.2% (47.4 – 78.8%)    |
| Model 2a: Elicited inputs        | 100.0% (99.6 – 100.0%)  | 98.4% (86.0 – 100.0%)   |
| Model 2b: Modified inputs*       | 100.0% (100.0 – 100.0%) | 100.0% (100.0 – 100.0%) |
| Model 2c: Elicited inputs        | 100.0% (99.9 – 100.0%)  | 99.2% (89.3 – 100.0%)   |

+ TE: Topographic effects.

\* Modified and ws based on MDR modeling and Sauter diameter of analogues (see Table 1).

**Table S9.** Numerical results of the minimum PDC volume and mass needed to reach the MS5, with and without consideration of topographic effects (see Section 4.4). Estimates based on 100,000 statistical samples.

| <b>No topographic effects modeled</b>                                       |              |               |             |               |
|-----------------------------------------------------------------------------|--------------|---------------|-------------|---------------|
| <i>MinVol: Minimum PDC volume [km<sup>3</sup>] required to reach MS5</i>    |              |               |             |               |
| <b>Model</b>                                                                | <b>5%ile</b> | <b>50%ile</b> | <b>mean</b> | <b>95%ile</b> |
| Model 1: Elicited inputs                                                    | 20.8         | 207           | 354         | 1160          |
| Model 2a: Elicited inputs                                                   | 8.26         | 45.1          | 63.0        | 183           |
| Model 2b: Modified inputs*                                                  | 5.91         | 13.5          | 14.1        | 24.3          |
| Model 2c: Elicited inputs                                                   | 5.52         | 35.3          | 52.1        | 162           |
| <i>MinMass: Minimum PDC mass [10<sup>12</sup> kg] required to reach MS5</i> |              |               |             |               |
| <b>Model</b>                                                                | <b>5%ile</b> | <b>50%ile</b> | <b>Mean</b> | <b>95%ile</b> |
| Model 1: Elicited inputs                                                    | 22.0         | 213           | 351         | 1110          |
| Model 2a: Elicited inputs                                                   | 14.0         | 77.5          | 108         | 315           |
| Model 2b: Modified inputs*                                                  | 10.1         | 23.1          | 23.9        | 41.1          |
| Model 2c: Elicited inputs                                                   | 9.25         | 60.2          | 89.9        | 281           |
| <b>With topographic effects included</b>                                    |              |               |             |               |
| <b>Minimum PDC volume [km<sup>3</sup>] required to reach MS5</b>            |              |               |             |               |
| <b>Model</b>                                                                | <b>5%ile</b> | <b>50%ile</b> | <b>mean</b> | <b>95%ile</b> |
| Model 1: Elicited inputs                                                    | 59.1         | 588           | 1010        | 3300          |
| Model 2a: Elicited inputs                                                   | 20.9         | 114           | 159         | 463           |
| Model 2b: Modified inputs*                                                  | 14.9         | 34.2          | 35.6        | 61.4          |
| Model 2c: Elicited inputs                                                   | 14.0         | 89.2          | 132         | 411           |
| <b>Minimum PDC mass [10<sup>12</sup> kg] required to reach MS5</b>          |              |               |             |               |
| <b>Model</b>                                                                | <b>5%ile</b> | <b>50%ile</b> | <b>mean</b> | <b>95%ile</b> |
| Model 1: Elicited inputs                                                    | 62.6         | 605           | 998         | 3160          |
| Model 2a: Elicited inputs                                                   | 35.5         | 196           | 272         | 797           |
| Model 2b: Modified inputs*                                                  | 25.7         | 58.5          | 60.6        | 104           |
| Model 2c: Elicited inputs                                                   | 23.4         | 152           | 228         | 711           |



**Table S10.** Numerical results of the probability that a PDC derived from a caldera-forming eruption similar to Aso-4 reaches the MS<sub>5</sub>, with and without topographic effects. We test the mass of PDC overflow outside of the caldera of Aso-4 and 1/10 of that estimate, representing the Aso-4T unit (volumes per Takarada and Hoshizumi, 2020). Estimates based on 100,000 statistical samples.

| <b>Aso-4T</b>                    |                         |                         |
|----------------------------------|-------------------------|-------------------------|
| <b>Model</b>                     | <b>TE+: No</b>          | <b>TE+: Yes</b>         |
| Model 1: Elicited inputs         | 22.2% (11.2 – 33.5%)    | 6.7% (2.7 – 11.0%)      |
| Model 2a: Elicited inputs        | 50.5% (29.0 – 67.2%)    | 20.0% (6.8 – 32.4%)     |
| Model 2b: Modified inputs*       | 100.0% (95.7 – 100.0%)  | 77.3% (24.8 – 98.6%)    |
| Model 2c: Elicited inputs        | 59.9% (37.8 – 74.3%)    | 28.5% (12.9 – 41.3%)    |
| <b>Aso-4, total PDC overflow</b> |                         |                         |
| <b>Model</b>                     | <b>TE+: No</b>          | <b>TE+: Yes</b>         |
| Model 1: Elicited inputs         | 88.8% (69.8 – 95.7%)    | 57.2% (39.8 – 69.4%)    |
| Model 2a: Elicited inputs        | 100.0% (98.9 – 100.0%)  | 94.7% (79.1 – 99.6%)    |
| Model 2b: Modified inputs*       | 100.0% (100.0 – 100.0%) | 100.0% (100.0 – 100.0%) |
| Model 2c: Elicited inputs        | 100.0% (99.5 – 100.0%)  | 96.6% (83.6 – 99.9%)    |

+ TE: Topographic effects.

\* Modified and ws based on MDR modeling and Sauter diameter of analogues (see Table 1).

## Probability distribution of MinMass

Topographic effects: No

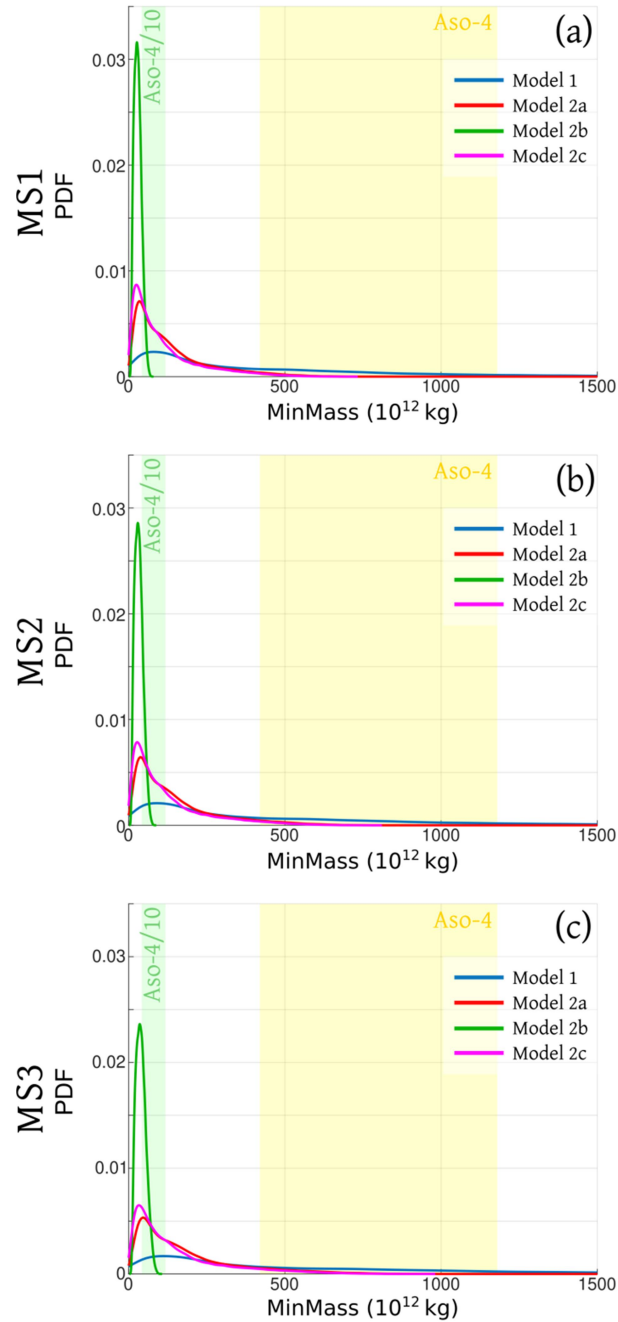

**Figure S11.** Probability density functions of the variable MinMass, calculated using Models 1, 2a, 2b, 2c and their combination. MinMass represents the mass of pyroclasts in a PDC flow required to invade the marker sites MS1-MS3, related to maximum runout distances equal to those of the marker sites. Estimates of the mass associated with the PDCs produced during the largest caldera-forming eruption of Aso are included: Aso-4/10, representing the Aso-4T unit, in green; Aso-4, total PDC overflow, in yellow (volumes per Takarada and Hoshizumi, 2020). Plots based on 100,000 statistical samples.

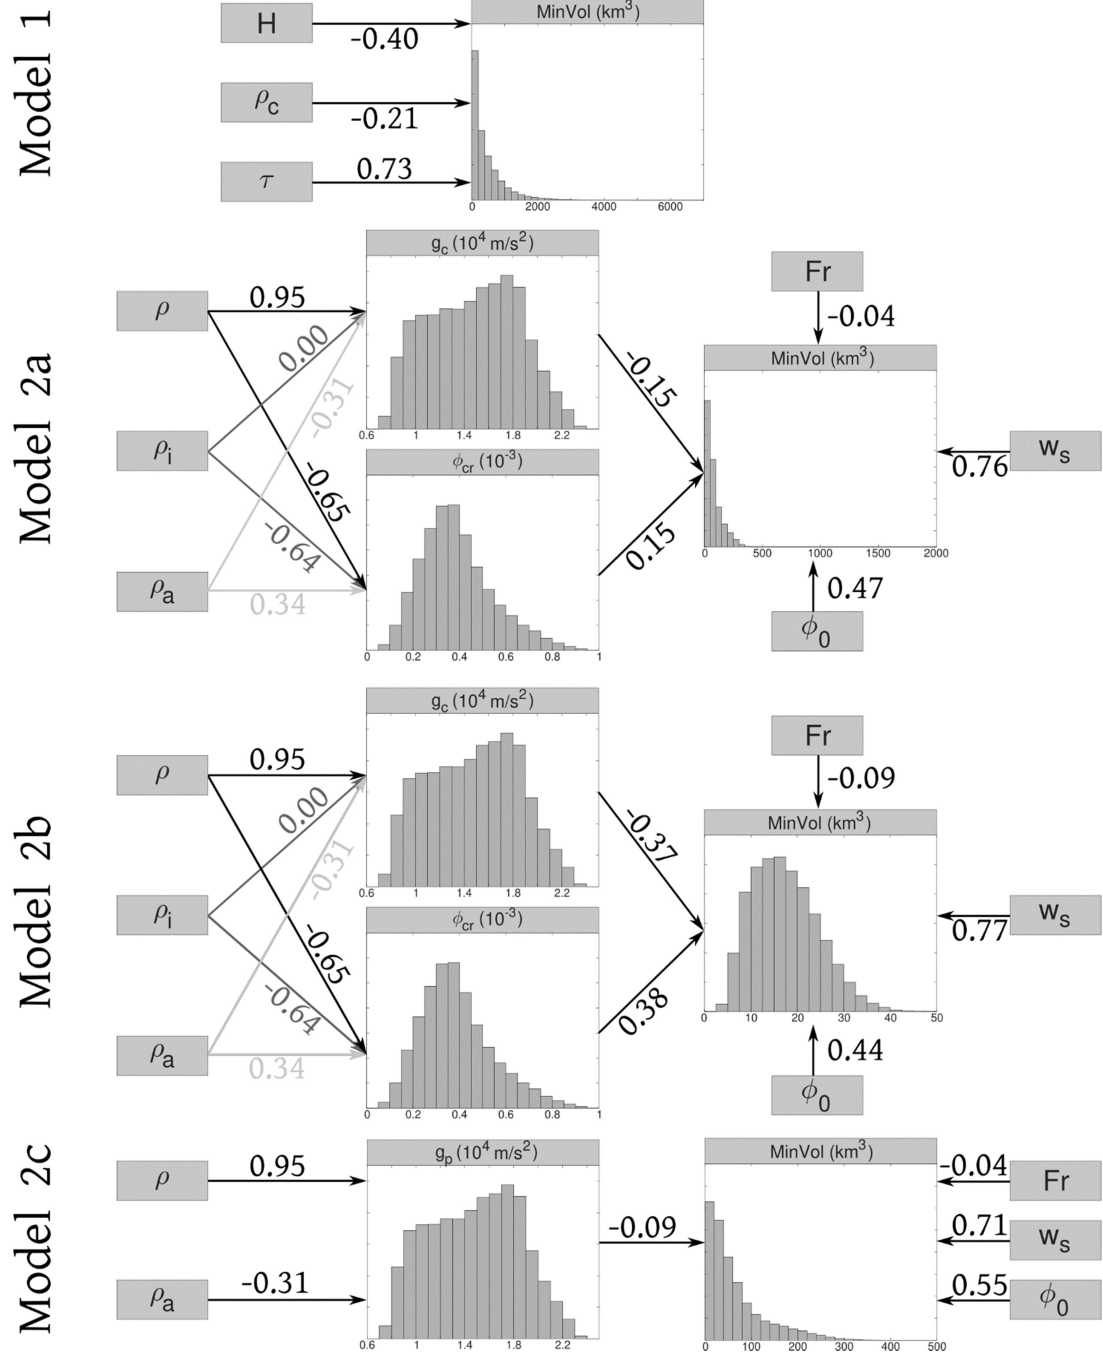

**Figure S12.** Sensitivity analysis of the parameter MinVol in the different models used in this work. Gray boxes indicate the input parameters, and the arrows indicate the correlation coefficients. BBN based on 100,000 statistical samples.
